# Supplementary material for: Methyl Salicylate Increases Attraction and Function of Beneficial Arthropods in Cranberries
Source: PubMed Central journal article supplement (PMC6955811; doi:10.3390/insects10120423), 2019-11-25
Supplement: insects-10-00423-s001.pdf [file insects-10-00423-s001.pdf]

**Methyl Salicylate Increases Attraction and Function of Beneficial Arthropods in Cranberries**

Jordano Salamanca, Brígida Souza, Vera Kyryczenko-Roth and Cesar Rodriguez-Saona

**Supplementary material**

**Table S1.** Number of insecticide applications throughout the 2011 and 2012 seasons in cranberry bogs.

| Year   | Farm   | Bog    | Application Date | Active Ingredient  | Trade Name         | Rate (per Acre) |
|--------|--------|--------|------------------|--------------------|--------------------|-----------------|
| 2011   | Farm A | 1      | 14-Jun           | Chlorpyrifos       | Warhawk            | 3 pts           |
|        |        | 2      |                  | Chlorpyrifos       | Warhawk            | 3 pts           |
|        |        | 3      |                  | Chlorpyrifos       | Warhawk            | 3 pts           |
|        |        | 4      |                  | Chlorpyrifos       | Warhawk            | 3 pts           |
|        | Farm B | 1      | 11-May           | Spinetoram         | Delegate WG        | 6 oz            |
|        |        | 2      | 12-May           | Methoxyfenozide    | Intrepid 2F        | 16 oz           |
|        |        |        | 28-May           | Chlorpyrifos       | Lorsban 4E         | 1.5 pts         |
|        |        | 3      | -                | -                  | -                  | -               |
|        | 4      | -      | -                | -                  | -                  |                 |
|        | Farm C | 1      | 11-Jul           | Imidacloprid       | Admire Pro         | 14 oz           |
|        |        | 2      |                  | Imidacloprid       | Admire Pro         | 14 oz           |
|        |        | 3      |                  | Imidacloprid       | Admire Pro         | 14 oz           |
|        |        | 4      |                  | Imidacloprid       | Admire Pro         | 14 oz           |
|        | Farm D | 1      | 14-May           | Methoxyfenozide    | Intrepid 2F        | 16 oz           |
|        |        |        | 26-May           | Diazinon           | Diazinon AG600 WBC | 2 qt            |
|        |        |        | 11-Jul           | Diazinon           | Diazinon AG600 WBC | 2 qt            |
|        |        | 2      | 14-May           | Methoxyfenozide    | Intrepid 2F        | 16 oz           |
|        |        |        | 26-May           | Diazinon           | Diazinon AG600 WBC | 2 qt            |
|        |        |        | 11-Jul           | Diazinon           | Diazinon AG600 WBC | 2 qt            |
|        |        | 3      | 26-May           | Diazinon           | Diazinon AG600 WBC | 2 qt            |
| 11-Jul |        |        | Diazinon         | Diazinon AG600 WBC | 2 qt               |                 |
| 4      |        | 26-May | Diazinon         | Diazinon AG600 WBC | 2 qt               |                 |
|        |        | 11-Jul | Diazinon         | Diazinon AG600 WBC | 2 qt               |                 |
| 2012   | Farm A | 1      | 16-Jul           | Diazinon           | Diazinon AG500     | 2 qt            |
|        |        | 2      |                  | Diazinon           | Diazinon AG500     | 2 qt            |
|        |        | 3      |                  | Methoxyfenozide    | Intrepid 2F        | 1 pt            |
|        |        | 4      |                  | Diazinon           | Diazinon AG500     | 2 qt            |
|        | Farm B | 1      | 18-May           | Chlorpyrifos       | Warhawk            | 1.5 pt          |
|        |        | 2      | 25-May           | Methoxyfenozide    | Intrepid 2F        | 16 floz         |
|        |        | 3      | 23-May           | Methoxyfenozide    | Intrepid 2F        | 16 floz         |
|        |        | 4      | -                | -                  | -                  | -               |
|        |        | 1      | 19-May           | Methoxyfenozide    | Intrepid 2F        | 16 floz         |

|           |           |        |                 |                       |                       |         |
|-----------|-----------|--------|-----------------|-----------------------|-----------------------|---------|
| Farm<br>C |           | 10-Jul | Diazinon        | Diazinon AG500        | 3 qt                  |         |
|           |           | 25-Aug | Diazinon        | Diazinon AG500        | 2 qt                  |         |
|           | 2         | 19-May | Methoxyfenozide | Intrepid 2F           | 16 floz               |         |
|           |           | 10-Jul | Diazinon        | Diazinon AG500        | 3 qt                  |         |
|           | 3         | 19-May | Methoxyfenozide | Intrepid 2F           | 16 floz               |         |
|           |           | 10-Jul | Diazinon        | Diazinon AG500        | 3 qt                  |         |
|           | 4         | 19-May | Methoxyfenozide | Intrepid 2F           | 16 floz               |         |
|           |           | 10-Jul | Diazinon        | Diazinon AG500        | 3 qt                  |         |
|           |           | 25-Aug | Diazinon        | Diazinon AG500        | 2 qt                  |         |
|           | Farm<br>D | 1      | 31-May          | Methoxyfenozide       | Intrepid 2F           | 16 floz |
|           |           |        | 09-Jul          | Diazinon              | Diazinon AG600<br>WBC | 2 qt    |
|           |           | 2      | 31-May          | Methoxyfenozide       | Intrepid 2F           | 16 floz |
| 09-Jul    |           |        | Diazinon        | Diazinon AG600<br>WBC | 2 qt                  |         |
| 3         |           | 31-May | Methoxyfenozide | Intrepid 2F           | 16 floz               |         |
|           |           | 09-Jul | Diazinon        | Diazinon AG600<br>WBC | 2 qt                  |         |
| 4         |           | 31-May | Methoxyfenozide | Intrepid 2F           | 16 floz               |         |
|           |           | 09-Jul | Diazinon        | Diazinon AG600<br>WBC | 2 qt                  |         |
